# Supplementary material
Source: publisher figshare collection journal article supplement (https://acs.figshare.com/ndownloader/files/20228955)
Supplement: Supplementary file 1 [file 20228955]

# Assembling Ni-Fe Layered Double Hydroxide 2D Thin Films for Oxygen Evolution Electrodes

- Supporting information -

*Massimo Rosa,<sup>1,\*</sup> Victor Costa Bassetto,<sup>2</sup> Hubert H. Girault,<sup>2</sup> Andreas Lesch,<sup>3,\*</sup> Vincenzo Esposito<sup>1,\*</sup>*

<sup>1</sup> DTU Energy, Technical University of Denmark, Risø Campus, Frederiksborgvej 399, 4000, Roskilde, Denmark

<sup>2</sup> Laboratory of Physical and Analytical Electrochemistry, École Polytechnique Fédérale de Lausanne (EPFL) Valais Wallis, Rue de l'Industrie 17, CH-1950 Sion, Switzerland.

<sup>3</sup> Department of Industrial Chemistry "Toso Montanari", University of Bologna, Viale del Risorgimento 4, 40136 Bologna, Italy.

\* CORRESPONDING AUTHORS FOOTNOTE

EMAILS: andreas.lesch@unibo.it, vies@dtu.dk, massimo.rosa@gmail.com

## **Table of content**

**SI-1. TEM image of Ni-Fe LDH**

**SI-2. Design of printed patterns**

**SI-3. Scotch tape test**

**SI-4. Ultra-low LDH loadings on GC**

**SI-5. Comparison of the OER activity of the inkjet printed Ni-Fe LDH electrode with other recently reported Ni-Fe LDH materials**

**SI-6. Polarization curves**

**SI-7. Durability test of the inkjet printed Ni-Fe LDH/GC electrode**

### SI-1. TEM image of Ni-Fe LDH

Figure S1 reports an additional TEM image of the Ni-Fe LDH. The low contrast of the platelets at 300 kV highlights the reduced thickness of the particles. The dark elongated particles are Ni-Fe LDH particles oriented perpendicular to the TEM grid.

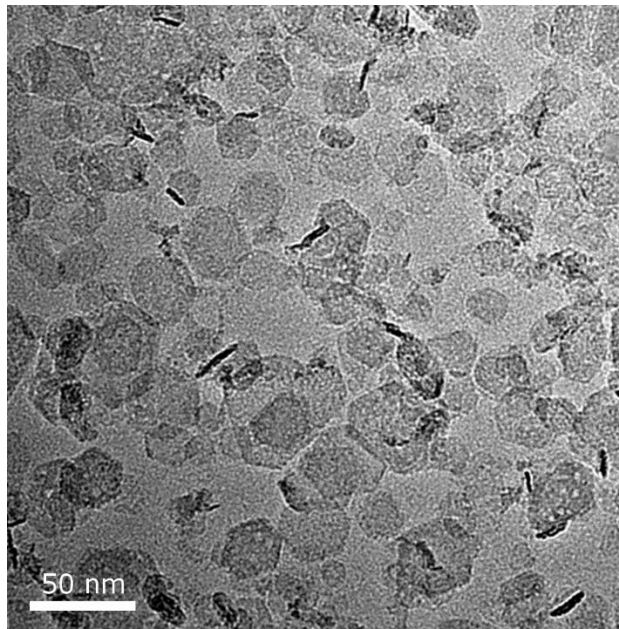

**Figure S1:** BF-TEM image of the NiFe LDH particles.

## SI-2. Design of printed patterns

Figure S2 shows schematically the fabrication process of the electrode shown in **Fig. 4a** by using inkjet printing.

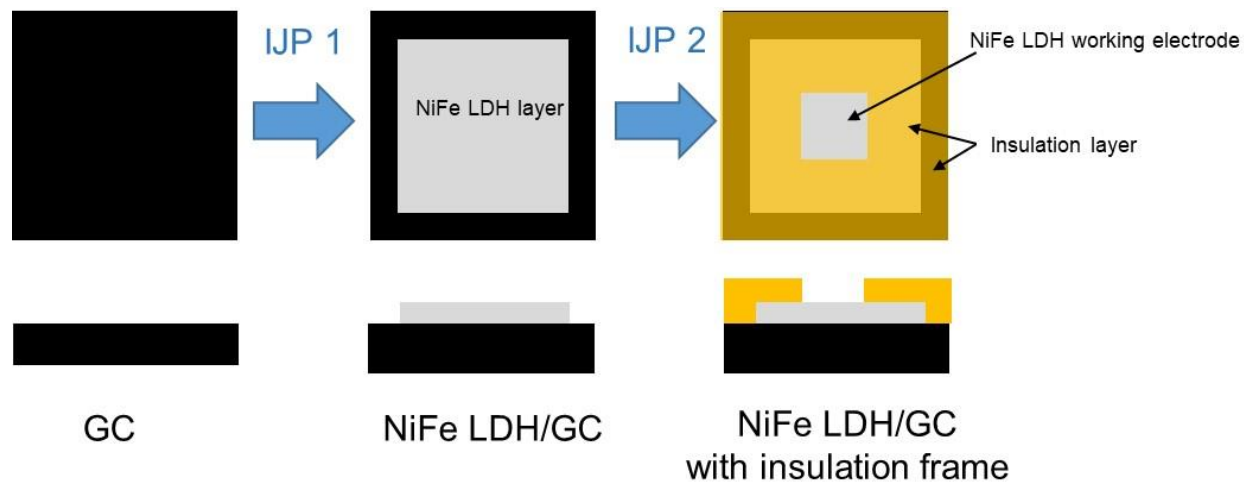

**Figure S2.** Schematic representation of the test electrode structure from **Fig. 4a** using multi-layer inkjet printing. Top: top view. Bottom: side view.

### SI-3. Scotch tape test

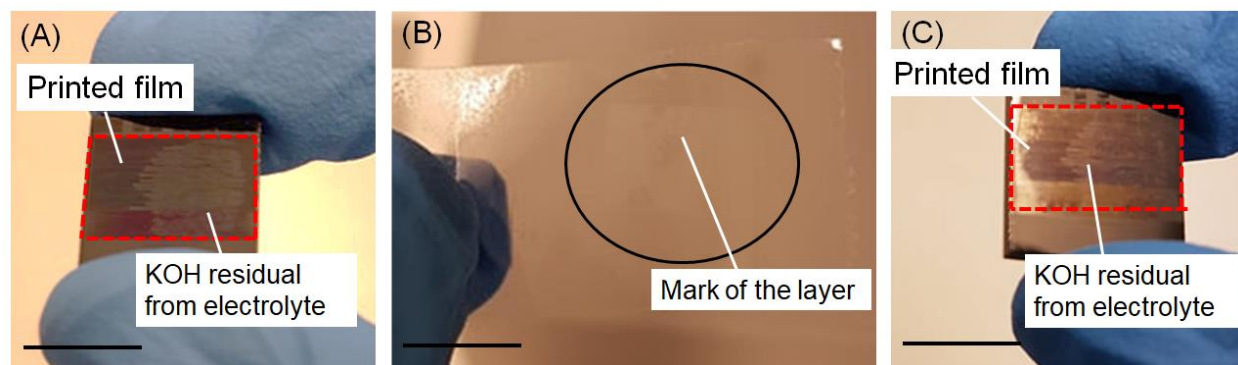

**Figure S3.** Result of the scotch tape test for estimating the adhesion of a Ni-Fe LDH inkjet printed film on GC. (A) Printed film before the tape test. The red dotted line indicates the printed area on GC. The image also shows the presence of a KOH residual formed after drying of the supporting electrolyte used in the electrochemical tests of this sample. (B) Photo of the tape after testing. The black circle indicates a very weak mark left by a slight detachment of material. (C) The printed film after the tape test, showing the presence of material adhered on the substrate.

#### SI-4. Ultra-low LDH loadings on GC

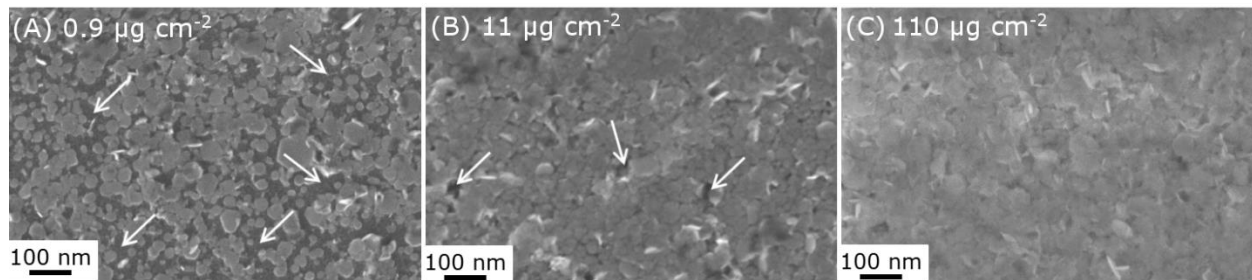

**Figure S4.** SEM of LDH layers with different loadings. (A)  $0.9 \mu\text{g cm}^{-2}$ , (B)  $11 \mu\text{g cm}^{-2}$  and (C)  $110 \mu\text{g cm}^{-2}$ . White arrows indicate uncovered substrate spots.

**SI-5. Comparison of the OER activity of the inkjet printed Ni-Fe LDH electrode with other recently reported Ni-Fe LDH materials**

**Table S1.** List of Ni-Fe LDH from the literature with material support, synthesis method, concentration of electrolyte solution, onset potential, overpotential, Tafel slope and nominal Ni:Fe ratio.

| Electrocatalyst                                                         | Support/<br>composite<br>material    | Synthesis                                                           | Concentration<br>of KOH<br>Electrolyte | Onset<br>potential<br>/ mV vs.<br>$E^\circ$<br>( $O_2, H_2O$ )<br>= 1.23 V | Overpotential<br>@ 10 mA/cm <sup>2</sup><br>current<br>density / mV<br>vs. $E^\circ$<br>( $O_2, H_2O$ ) =<br>1.23 V | Tafel<br>slope /<br>mV·<br>dec <sup>-1</sup> | Nominal<br>Ni:Fe<br>ratio | Ref.      |
|-------------------------------------------------------------------------|--------------------------------------|---------------------------------------------------------------------|----------------------------------------|----------------------------------------------------------------------------|---------------------------------------------------------------------------------------------------------------------|----------------------------------------------|---------------------------|-----------|
| NiFe LDH                                                                | GC                                   | CHFS                                                                | 0.1 M                                  | -                                                                          | 280                                                                                                                 | 32                                           | 3:1                       | This work |
| Ni-Fe-LDH                                                               | sandblasted<br>Ni plates, Ni<br>foam | Batch<br>Hydrothermal                                               | 1 M                                    | -                                                                          | 280                                                                                                                 | 37                                           | optimum<br>7:3/3:2        | 1         |
| NiFe-LDH/Fe-N-<br>carbon nanofibers                                     | GC                                   | Batch<br>Hydrothermal                                               | 1 M                                    | -                                                                          | 263                                                                                                                 | 81                                           | 3:1                       | 2         |
| NiFe-LDH                                                                | GC                                   | Batch<br>Hydrothermal                                               | 1 M                                    | 420 (vs<br>MOE)                                                            | 197                                                                                                                 | 100                                          | 2.9:1                     | 3         |
| NiFe-LDH/oxygen-<br>decorated<br>graphene/single-<br>walled CNT hybrids | GC                                   | Urea assisted<br>co-precipitation<br>with oGSHs as<br>the substrate | 0.1 M                                  | 240                                                                        | 350                                                                                                                 | 54                                           | 3:1                       | 4         |
| NiFe-LDH/CNT                                                            | GC and<br>carbon fiber<br>paper      | Batch<br>Solvothelmal                                               | 0.1 M                                  | 270                                                                        | 290                                                                                                                 | 35                                           | 5:1                       | 5         |
| NiFe-LDH/Ni foam                                                        | Ni foam                              | Potentiostatic<br>deposition                                        | 1 M                                    | 220                                                                        | 250                                                                                                                 | 31                                           | 1:1                       | 6         |
| NiFe-LDH platelets                                                      | GC                                   | Batch<br>Hydrothermal                                               | 1 M                                    | -                                                                          | 350                                                                                                                 | 65                                           | 3:1                       | 7         |
| Exfoliated<br>nanosheets                                                |                                      |                                                                     |                                        |                                                                            | 300                                                                                                                 | 40                                           | 3:1                       |           |
| NiFe-LDH<br>intercalated with<br>SDS                                    | Carbon fiber<br>paper                | Batch<br>Hydrothermal                                               | 1 M                                    | -                                                                          | 289                                                                                                                 | 39                                           | 2:1                       | 8         |
| NiFe LDH/<br>Graphene oxide<br>Best: rGO                                | Ni Foam                              | Batch<br>Hydrothermal                                               | 1 M                                    | 190                                                                        | 205                                                                                                                 | 39                                           | 3:1                       | 9         |
| NiFe LDH/Carbon<br>Dot                                                  | GC                                   | Batch<br>Solvothelmal                                               | 1 M                                    | 210                                                                        | 230                                                                                                                 | 30                                           | 5:1                       | 10        |
| NiFe LDH                                                                | Ni Foam                              | Batch<br>Hydrothermal                                               | 0.1 M                                  | 230                                                                        | 240                                                                                                                 | 50                                           | 3:1                       | 11        |

## SI-6. Polarization curves

Polarization curves of four Ni-Fe LDH samples printed with loadings of 50 and 150  $\mu\text{g}\cdot\text{cm}^{-2}$  are shown (two curves from **Fig. 5(b)**). For clarity, only voltammograms recorded before the aging step are reported.

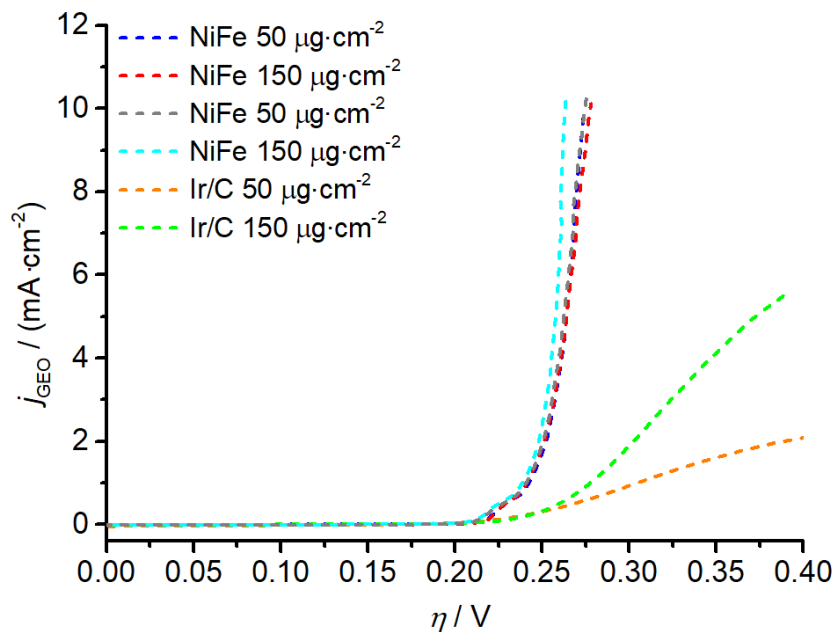

**Figure S5:** Additional polarization curves of samples printed with loadings of 50 (grey) and 150 (blue)  $\mu\text{g}\cdot\text{cm}^{-2}$ . The remaining curves correspond to the voltammograms in **Fig. 5(b)**.



### SI-7. Durability test of the inkjet printed Ni-Fe LDH/GC electrode

Chronopotentiometric experiment with the RDE were carried out for 3h with a current density of  $10 \text{ mA cm}^{-2}$  and rotating speed of 1600 rpm.

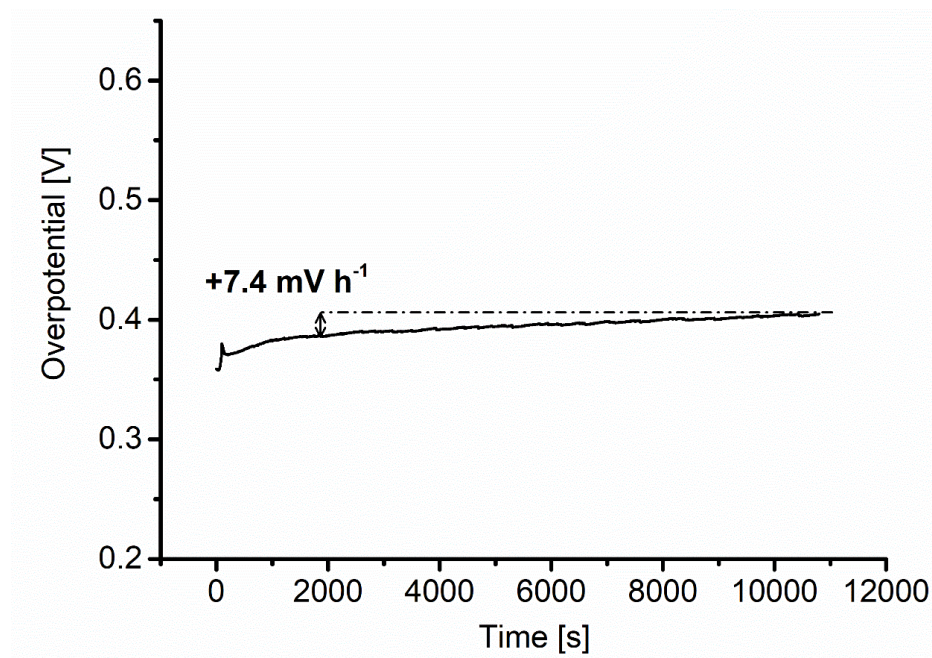

**Figure S6.** Chronopotentiometric durability test at  $10 \text{ mA cm}^{-2}$  performed in RDE configuration of a Ni-Fe LDH sample printed on a glassy carbon rod with a loading of  $60 \mu\text{g cm}^{-2}$  previously cycled 50 times. The overpotential is not  $iR$ -corrected.

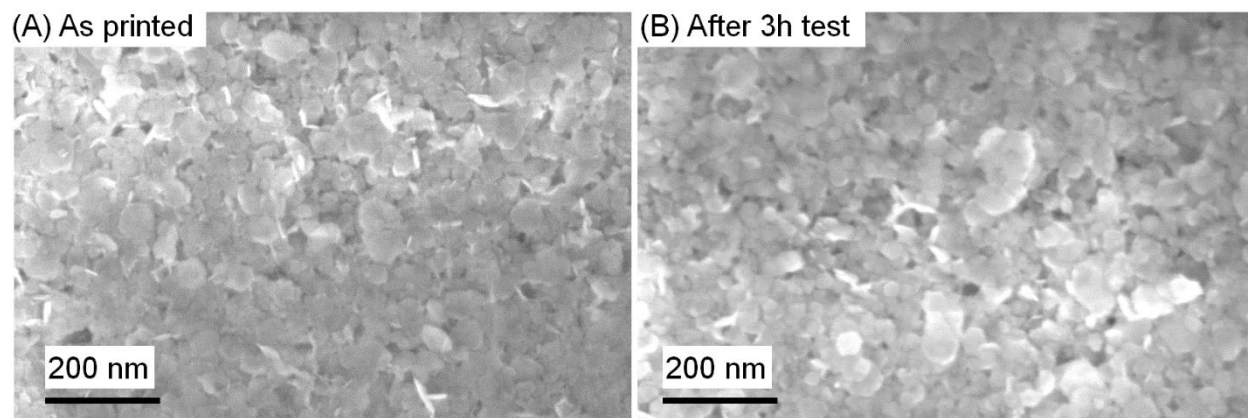

**Figure S7.** SEM of the Ni-Fe LDH/GC electrode before (A) and after (B) the durability test.

## References

- (1) Lee, S.; Cho, H.-S.; Cho, W.-C.; Kim, S.-K.; Cho, Y.; Kim, C.-H. Operational Durability of Three-Dimensional Ni-Fe Layered Double Hydroxide Electrocatalyst for Water Oxidation. *Electrochim. Acta* **2019**. <https://doi.org/10.1016/j.electacta.2019.05.088>.
- (2) Sun, W.; Du, L.; Du, C.; Gao, Y.; Yin, G. Three-Dimensional Layered Double Hydroxides on Carbon Nanofibers: The Engineered Mass Transfer Channels and Active Sites towards Oxygen Evolution Reaction. *Appl. Surf. Sci.* **2019**, *485*, 41–47. <https://doi.org/10.1016/j.apsusc.2019.03.335>.
- (3) Zhang, H.; Li, H.; Akram, B.; Wang, X. Fabrication of NiFe Layered Double Hydroxide with Well-Defined Laminar Superstructure as Highly Efficient Oxygen Evolution Electrocatalysts. *Nano Res.* **2019**. <https://doi.org/10.1007/s12274-019-2284-0>.
- (4) Zhu, X.; Tang, C.; Wang, H. F.; Zhang, Q.; Yang, C.; Wei, F. Dual-Sized NiFe Layered Double Hydroxides in Situ Grown on Oxygen-Decorated Self-Dispersal Nanocarbon as Enhanced Water Oxidation Catalysts. *J. Mater. Chem. A* **2015**, *3* (48), 24540–24546. <https://doi.org/10.1039/c5ta08019c>.
- (5) Gong, M.; Li, Y.; Wang, H.; Liang, Y.; Wu, J. Z.; Zhou, J.; Wang, J.; Regier, T.; Wei, F.; Dai, H. An Advanced Ni-Fe Layered Double Hydroxide Electrocatalyst for Water Oxidation. *J. Am. Chem. Soc.* **2013**, *135* (23), 8452–8455. <https://doi.org/10.1021/ja4027715>.
- (6) Liu, Y.; Liang, X.; Gu, L.; Zhang, Y.; Li, G. D.; Zou, X.; Chen, J. S. Corrosion Engineering towards Efficient Oxygen Evolution Electrodes with Stable Catalytic Activity for over 6000 Hours. *Nat. Commun.* **2018**, *9* (1), 1–10. <https://doi.org/10.1038/s41467-018-05019-5>.
- (7) Song, F.; Hu, X. Exfoliation of Layered Double Hydroxides for Enhanced Oxygen Evolution Catalysis. *Nat. Commun.* **2014**, *5*, 1–9. <https://doi.org/10.1038/ncomms5477>.
- (8) Zhong, H.; Cheng, X.; Xu, H.; Li, L.; Li, D.; Tang, P.; Alonso-Vante, N.; Feng, Y. Carbon Fiber Paper Supported Interlayer Space Enlarged Ni<sub>2</sub>Fe-LDHs Improved OER Electrocatalytic Activity. *Electrochim. Acta* **2017**, *258*, 554–560. <https://doi.org/10.1016/j.electacta.2017.11.098>.
- (9) Long, X.; Li, J.; Xiao, S.; Yan, K.; Wang, Z.; Chen, H.; Yang, S. A Strongly Coupled Graphene and FeNi Double Hydroxide Hybrid as an Excellent Electrocatalyst for the Oxygen Evolution Reaction.

- Angew. Chemie - Int. Ed.* **2014**, *53* (29), 7584–7588. <https://doi.org/10.1002/anie.201402822>.
- (10) Tang, D.; Liu, J.; Wu, X.; Liu, R.; Han, X.; Han, Y.; Huang, H.; Liu, Y.; Kang, Z. Carbon Quantum Dot/NiFe Layered Double-Hydroxide Composite as a Highly Efficient Electrocatalyst for Water Oxidation. *ACS Appl. Mater. Interfaces* **2014**, *6* (10), 7918–7925. <https://doi.org/10.1021/am501256x>.
- (11) Lu, Z.; Xu, W.; Zhu, W.; Yang, Q.; Lei, X.; Liu, J.; Li, Y.; Sun, X.; Duan, X. Three-Dimensional NiFe Layered Double Hydroxide Film for High-Efficiency Oxygen Evolution Reaction. *Chem. Commun.* **2014**, *50* (49), 6479–6482. <https://doi.org/10.1039/c4cc01625d>.
